# Supplementary material for: Cortical Composition Hierarchy Driven by Spine Proportion Economical Maximization or Wire Volume Minimization
Source: PubMed Central journal article supplement (PMC4593638; doi:10.1371/journal.pcbi.1004532), 2015-10-05
Supplement: pcbi.1004532.s001.pdf [file pcbi.1004532.s001.pdf]

**Supporting Information for:**

Cortical composition hierarchy driven by spine proportion  
economical maximization or wire volume minimization

Jan Karbowski

*Institute of Applied Mathematics and Mechanics,  
University of Warsaw, ul. Banacha 2, 02-097 Warsaw, Poland;*

Email: [jkarbowski@mimuw.edu.pl](mailto:jkarbowski@mimuw.edu.pl)

# Supporting Figure

**Figure A.** (see below)

Euclidean distance ED for heavy-tailed distributions of spine sizes as a function of exponent  $\gamma_2$  for spine economical maximization. (A) ED for Log-logistic distribution with different values of  $\beta$ . (B) ED for Log-normal distribution with different values of  $\sigma$ . In both panels  $\theta = 0.321 \mu\text{m}^3$ .

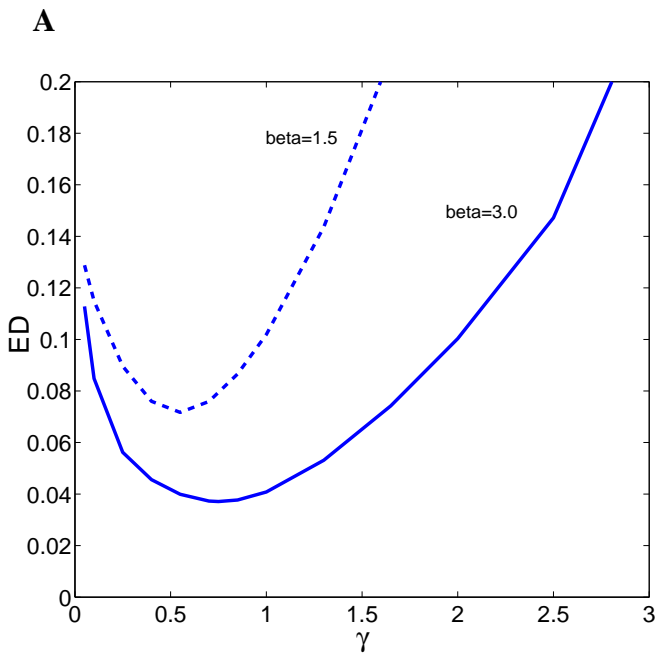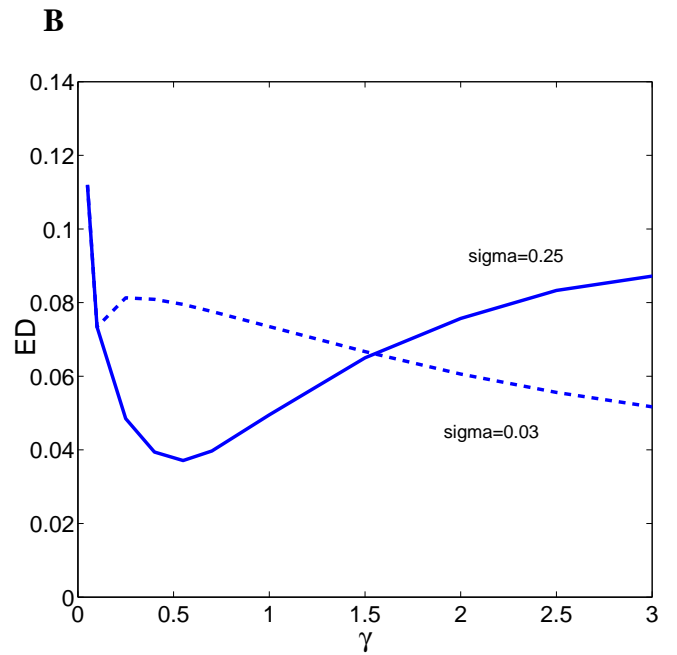

# THEORETICAL MODELS

Below, the details of calculations are provided for the three principles considered in the main text.

## 1 Wire minimization principle.

### 1.1 The system of basic equations for optimal solution.

#### Explicit form of the fitness function.

The explicit dependence of the fitness function  $F_w$  on the three parameters  $x, y, \bar{u}$  is given as

$$F_w = \frac{rx + y}{\bar{u}^{\gamma_1}} + \lambda_1 \left( x + y + Pxy + \frac{a(Pxy)^{2/3}}{\bar{u}^{2/3}} + \frac{a(Pxy)^{5/3}}{\bar{u}^{2/3}} - 1 \right), \quad (1)$$

where the parameter  $a = (3\pi^2/256)^{1/3} d_{as}^2 = 0.352 \mu\text{m}^2$ .

#### The basic optimal equations.

The optimal values of fractional volumes of axons and dendrites  $x, y$ , average spine volume  $\bar{u}$ , and the Lagrange multiplier  $\lambda_1$  are found by differentiating the benefit-cost function  $F_w$  with respect to  $x, y, \bar{u}$ , and  $\lambda_1$ , and requiring that

$$\partial F_w / \partial x = \partial F_w / \partial y = \partial F_w / \partial \bar{u} = \partial F_w / \partial \lambda_1 = 0,$$

which corresponds to a critical point of  $F_w$ . Consequently, we obtain the following set of four nonlinear equations:

$$r + \lambda_1 \bar{u}^{\gamma_1} \left( 1 + Py + \frac{a}{3} \left( \frac{P^2 y^2}{x \bar{u}^2} \right)^{1/3} [2 + 5Pxy] \right) = 0, \quad (2)$$

$$1 + \lambda_1 \bar{u}^{\gamma_1} \left( 1 + Px + \frac{a}{3} \left( \frac{P^2 x^2}{y \bar{u}^2} \right)^{1/3} [2 + 5Pxy] \right) = 0, \quad (3)$$

$$\gamma_1(rx + y) = \lambda_1 \bar{u}^{\gamma_1+1} \left[ \frac{\partial P}{\partial \bar{u}} \left( xy + \frac{a(xy)^{2/3}}{3P^{1/3} \bar{u}^{2/3}} (2 + 5Pxy) \right) - \frac{2a(Pxy)^{2/3}}{3\bar{u}^{5/3}} (1 + Pxy) \right] \quad (4)$$

and

$$x + y + Pxy + \frac{a(Pxy)^{2/3}}{\bar{u}^{2/3}} + \frac{a(Pxy)^{5/3}}{\bar{u}^{2/3}} = 1. \quad (5)$$

### **Reduction of dimensionality in the system of basic equations.**

Next, we show that we can decrease the number of basic equations from 4 to 3. First, we can get rid of  $\lambda_1$ , since it always appears in the first power. The parameter  $\lambda_1$  can be determined from Eq. (3) and it reads:

$$\lambda_1 = -\frac{1}{\bar{u}^{\gamma_1} \left( 1 + Px + \frac{a}{3} \left( \frac{P^2 x^2}{\bar{u}^2 y} \right)^{1/3} [2 + 5Pxy] \right)}. \quad (6)$$

Next, we can insert  $\lambda_1$  into Eqs. (2) and (4). As a result we obtain Eqs. (29) and (30) in the main text.

## 1.2 Proof of the local minimum for optimal solution related to wire minimization.

Let us introduce the following notation:  $x_1 \equiv x$ ,  $x_2 \equiv y$ ,  $x_3 \equiv \bar{u}$ . Then the function  $F_w$  (Eq. 1) can be rewritten as:

$$F_w = \frac{rx_1 + x_2}{x_3^{\gamma_1}} + \lambda_1 g(x_1, x_2, x_3), \quad (7)$$

where  $g(x_1, x_2, x_3)$  denotes the constraint term present in Eq. (1). Let us define partial derivatives:  $F_{ij} = \partial^2 F_w / \partial x_i \partial x_j$  and  $g_i = \partial g / \partial x_i$ , which are determined at the critical point represented by optimal values of  $x_1, x_2, x_3$ . Using these definitions we can construct a matrix called bordered Hessian for our constraint optimization problem as [2]:

$$\begin{bmatrix} 0 & g_1 & g_2 & g_3 \\ g_1 & F_{11} & F_{12} & F_{13} \\ g_2 & F_{21} & F_{22} & F_{23} \\ g_3 & F_{31} & F_{32} & F_{33} \end{bmatrix}$$

This is a symmetric matrix, i.e.  $F_{ij} = F_{ji}$ .

A sufficient condition for  $F_w$  to have a local minimum at the critical point represented by the optimal values  $x_1, x_2, x_3$  is that two principal minors, i.e. determinants of the upper-left sub-matrices 3x3 (called  $D_1$ ) and 4x4 (determinant of the entire bordered Hessian called  $D_2$ ), have negative signs [2]. The explicit forms of these determinants are as follows:

$$D_1 = -g_1^2 F_{22} - g_2^2 F_{11} + g_1 g_2 (F_{12} + F_{21}) \quad (8)$$

and

$$\begin{aligned} D_2 = & g_1^2 (F_{23}^2 - F_{22} F_{33}) + g_2^2 (F_{13}^2 - F_{11} F_{33}) \quad (9) \\ & + g_3^2 (F_{12}^2 - F_{11} F_{22}) + 2g_1 g_2 (F_{12} F_{33} - F_{13} F_{23}) \\ & + 2g_1 g_3 (F_{13} F_{22} - F_{12} F_{23}) + 2g_2 g_3 (F_{11} F_{23} - F_{12} F_{13}) \end{aligned}$$

Exact numerical values of the minors  $D_1$  and  $D_2$  are presented in Table A (below) together with the values of  $F_{ij}$ . These results indicate that indeed we have local minima at the critical points.

**Table A:** “Wire minimization” approach. The numerical values of the elements of the bordered Hessian and principal minors for each type of the spine volume distribution.

| Spine size distribution | $\theta$   | Bordered Hessian |          |          |          |          | Minors   |        |        |
|-------------------------|------------|------------------|----------|----------|----------|----------|----------|--------|--------|
|                         |            | $F_{11}$         | $F_{12}$ | $F_{22}$ | $F_{13}$ | $F_{23}$ | $F_{33}$ | $D_1$  | $D_2$  |
| Exponential             | 0.100 (ED) | 0.117            | -0.905   | 0.162    | -0.196   | -0.230   | 2.476    | -5.529 | -13.69 |
|                         | 0.100 (MD) | 0.107            | -0.890   | 0.174    | -0.185   | -0.236   | 2.433    | -5.449 | -13.25 |
|                         | 0.321 (ED) | 0.031            | -0.748   | 0.041    | -0.020   | -0.023   | 0.026    | -3.365 | -0.087 |
|                         | 0.321 (MD) | 0.036            | -0.764   | 0.036    | -0.022   | -0.022   | 0.026    | -3.433 | -0.090 |
| Gamma (n=1)             | 0.100 (ED) | 0.110            | -1.045   | 0.156    | -0.191   | -0.227   | 3.205    | -7.020 | -22.49 |
|                         | 0.100 (MD) | 0.074            | -0.967   | 0.216    | -0.146   | -0.249   | 2.919    | -6.579 | -19.19 |
|                         | 0.321 (ED) | 0.033            | -0.843   | 0.045    | -0.026   | -0.031   | 0.082    | -4.148 | -0.341 |
|                         | 0.321 (MD) | 0.037            | -0.856   | 0.041    | -0.028   | -0.030   | 0.084    | -4.211 | -0.352 |
| Gamma (n=2)             | 0.100 (ED) | 0.112            | -1.118   | 0.156    | -0.201   | -0.238   | 4.440    | -7.925 | -35.19 |
|                         | 0.100 (MD) | 0.063            | -0.993   | 0.254    | -0.134   | -0.269   | 3.813    | -7.196 | -27.42 |
|                         | 0.321 (ED) | 0.036            | -0.891   | 0.047    | -0.031   | -0.036   | 0.155    | -4.585 | -0.712 |
|                         | 0.321 (MD) | 0.038            | -0.901   | 0.045    | -0.033   | -0.035   | 0.157    | -4.632 | -0.727 |
| Rayleigh                | 0.100 (ED) | 0.117            | -1.121   | 0.171    | -0.219   | -0.265   | 5.876    | -8.101 | -47.60 |
|                         | 0.100 (MD) | 0.063            | -0.987   | 0.288    | -0.141   | -0.301   | 4.979    | -7.327 | -36.45 |
|                         | 0.321 (ED) | 0.040            | -0.890   | 0.052    | -0.036   | -0.042   | 0.199    | -4.608 | -0.918 |
|                         | 0.321 (MD) | 0.042            | -0.899   | 0.050    | -0.038   | -0.041   | 0.201    | -4.655 | -0.938 |
| Log-logistic            | 0.100 (ED) | 0.060            | -0.856   | 0.080    | -0.065   | -0.075   | 0.243    | -4.482 | -1.088 |
|                         | 0.100 (MD) | 0.062            | -0.860   | 0.078    | -0.067   | -0.075   | 0.244    | -4.505 | -1.099 |
|                         | 0.321 (ED) | 0.037            | -0.936   | 0.048    | -0.035   | -0.040   | 0.310    | -5.012 | -1.555 |
|                         | 0.321 (MD) | 0.039            | -0.967   | 0.057    | -0.042   | -0.050   | 0.594    | -5.394 | -3.205 |
| Log-normal              | 0.100 (ED) | 0.073            | -0.696   | 0.095    | -0.079   | -0.090   | 1.323    | -3.290 | -4.354 |
|                         | 0.100 (MD) | 0.089            | -0.791   | 0.113    | -0.114   | -0.129   | 3.283    | -4.140 | -13.59 |
|                         | 0.321 (ED) | 0.045            | -0.838   | 0.061    | -0.042   | -0.049   | 0.985    | -4.206 | -4.141 |
|                         | 0.321 (MD) | 0.050            | -0.925   | 0.069    | -0.055   | -0.064   | 2.458    | -5.061 | -12.44 |

For each value of  $\theta$  there are two values of Hessian matrix and Minors corresponding to minimal Euclidean (ED) and Mahalanobis (MD) distances.

## 2 Spine economical maximization principle.

### 2.1 The system of basic equations for optimal solution.

#### Explicit form of the fitness function.

The explicit dependence of the benefit-cost function  $F_s$  on the three parameters  $x, y, \bar{u}$  is given as

$$F_s = \frac{Pxy}{\bar{u}^{\gamma^2}} + \lambda_2 \left( x + y + Pxy + \frac{a(Pxy)^{2/3}}{\bar{u}^{2/3}} + \frac{a(Pxy)^{5/3}}{\bar{u}^{2/3}} - 1 \right). \quad (10)$$

#### The basic optimal equations.

The optimal values of  $x, y, \bar{u}$ , and  $\lambda_2$  are found by differentiating the benefit-cost function  $F_s$  (Eq. 10) with respect to  $x, y, \bar{u}$ , and  $\lambda_2$ , and requiring that appropriate derivatives are zero. As a result, we obtain the following set of four nonlinear equations:

$$Py + \lambda_2 \bar{u}^{\gamma^2} \left( 1 + Py + \frac{a}{3} \left( \frac{P^2 y^2}{x \bar{u}^2} \right)^{1/3} [2 + 5Pxy] \right) = 0, \quad (11)$$

$$Px + \lambda_2 \bar{u}^{\gamma^2} \left( 1 + Px + \frac{a}{3} \left( \frac{P^2 x^2}{y \bar{u}^2} \right)^{1/3} [2 + 5Pxy] \right) = 0, \quad (12)$$



$$\left[ \left( \frac{1}{\bar{u}^{\gamma_2}} + \lambda_2 \right) (xy)^{1/3} + \frac{a\lambda_2(2 + 5Pxy)}{3(P\bar{u}^2)^{1/3}} \right] \frac{\partial P}{\partial \bar{u}} = \left[ \frac{\gamma_2(xy)^{1/3}}{\bar{u}^{\gamma_2+1}} + \frac{2a\lambda_2(1 + Pxy)}{3(P\bar{u}^5)^{1/3}} \right] P, \quad (13)$$

and

$$x + y + Pxy + \frac{a(Pxy)^{2/3}}{\bar{u}^{2/3}} + \frac{a(Pxy)^{5/3}}{\bar{u}^{2/3}} = 1. \quad (14)$$

Note that from Eqs. (11) and (12) it follows that  $\lambda_2$  must be negative, since all other terms on the left hand side are positive. This observation is used below for determination of the type of extremum.

**Proof that  $x = y$ .**

First, we show that for optimal  $x$  and  $y$  we have  $x = y$ . To do this, we subtract Eqs. (11) and (12). As a result we get:

$$(y - x) \left[ P(1 + \lambda_2 \bar{u}^{\gamma_2}) + \lambda_2 \bar{u}^{\gamma_2} \frac{a}{3} \left( \frac{P^2}{xy\bar{u}^2} \right)^{1/3} (2 + 5Pxy) \right] = 0, \quad (15)$$

where the expression in the [...] bracket is equal either to  $-\lambda_2 \bar{u}^{\gamma_2}/y$  (from Eq. 11) or to  $-\lambda_2 \bar{u}^{\gamma_2}/x$  (from Eq. 12). Thus, Eq. (15) is equivalent to the following equation:

$$(y - x) \frac{\lambda_2 \bar{u}^{\gamma_2}}{y} = 0, \quad (16)$$

which implies that for nonzero  $\lambda_2$  and  $\bar{u}$  we must have  $x = y$ . (The benefit-cost function  $F_s$  is defined only for  $\bar{u} > 0$ , see Eq. 10). If however,  $\lambda_2 = 0$ , then from Eqs. (11) and (12) we get that  $Px = Py = 0$ . The case  $P = 0$  implies  $\bar{u} = 0$  (see eqs relating  $P$  and  $\bar{u}$  in the Methods), which however is forbidden. Thus  $P \neq 0$ , and in this case we must have  $x = y = 0$ , i.e.  $x$  and  $y$  are still equal to each other.

### **Reduction of dimensionality in the system of basic equations.**

Next, we show that we can decrease the number of basic equations. Because  $x = y$ , we can reduce the system of 4 equations to the system of 3 equations with unknowns  $x, \bar{u}, \lambda_2$  (Eqs. 11 and 12 are in fact the same equation). Moreover, we can get rid of  $\lambda_2$ , since it always appears in the first power, which additionally allows us to reduce the system dimensionality to 2. The parameter  $\lambda_2$  can be determined from Eq. (11) (with the substitution  $y = x$ ) and it reads:

$$\lambda_2 = - \frac{Px}{\bar{u}^{\gamma_2} \left( 1 + Px + \frac{a}{3} \left( \frac{P^2 x}{\bar{u}^2} \right)^{1/3} [2 + 5Px^2] \right)}. \quad (17)$$

Next, we can insert  $\lambda_2$  into Eq. (13). After this procedure Eq.(13) becomes

$$\bar{u}^{2/3} \frac{\partial P}{\partial \bar{u}} = \frac{P}{\bar{u}} \left( \gamma_2 \bar{u}^{2/3} (1 + Px) + \frac{a}{3} P^{2/3} x^{1/3} [2(\gamma_2 - 1) + (5\gamma_2 - 2)Px^2] \right) \quad (18)$$

and Eq. (14) after the substitution  $y = x$  becomes

$$2x + Px^2 + \frac{aP^{2/3}x^{4/3}}{\bar{u}^{2/3}} + \frac{aP^{5/3}x^{10/3}}{\bar{u}^{2/3}} = 1. \quad (19)$$

The derivatives of  $P$  with respect to  $\bar{u}$  have different forms depending on the type of density probability of spine volumes  $H(u)$  (see the main text).

Eqs. (18) and (19) constitute the reduced system of basic equations, which is used for computations of two independent variables  $x$  and  $\bar{u}$ . This two-dimensional system can be solved by a handful of numerical techniques (e.g. [1]).

## 2.2 Proof of the local maximum for optimal solution related to spine economy.

As before, let us introduce the following notation:  $x_1 \equiv x$ ,  $x_2 \equiv y$ ,  $x_3 \equiv \bar{u}$ . Then the fitness function  $F_s$  (Eq. 10) can be rewritten as:

$$F_s = \frac{Px_1x_2}{x_3^{\gamma_2}} + \lambda_2g(x_1, x_2, x_3), \quad (20)$$

where the probability  $P$  is a function of  $x_3$ , and  $g(x_1, x_2, x_3)$  denotes the constraint term present in Eq. (10). Let us define partial derivatives:  $F_{ij} = \partial^2 F_s / \partial x_i \partial x_j$  and  $g_i = \partial g / \partial x_i$ ,

which are determined at the critical point represented by optimal values of  $x_1, x_2, x_3$ . Using these definitions we can construct a matrix called bordered Hessian for our constraint optimization problem as [2]:

$$\begin{bmatrix} 0 & g_1 & g_2 & g_3 \\ g_1 & F_{11} & F_{12} & F_{13} \\ g_2 & F_{21} & F_{22} & F_{23} \\ g_3 & F_{31} & F_{32} & F_{33} \end{bmatrix}$$

This particular matrix has a high degree of symmetry, since:  $g_1 = g_2$ ,  $F_{ij} = F_{ji}$ , and additionally  $F_{11} = F_{22}$ ,  $F_{13} = F_{23}$ .

A sufficient condition for  $F_s$  to have a local maximum at the critical point represented by the optimal values  $x_1, x_2, x_3$  is that two principal minors, i.e. determinants of the upper-left sub-matrices 3x3 (called  $D_1$ ) and 4x4 (determinant of the entire bordered Hessian called  $D_2$ ), alternate in sign. Specifically, the principal minors must have respectively positive ( $D_1$ ) and negative ( $D_2$ ) signs [2]. Using the high symmetry in the Hessian matrix, the explicit forms of these determinants are as follows:

$$D_1 = 2g_1^2(F_{12} - F_{11}) \quad (21)$$

and

$$D_2 = g_1^2(F_{12} - F_{11}) \left[ 2F_{33} - 4\epsilon F_{13} + \epsilon^2(F_{12} + F_{11}) \right], \quad (22)$$

where  $\epsilon \equiv g_3/g_1$ . It is relatively easy to show that  $g_1 \geq 1$ , and the expression for  $\epsilon$  reads

$$\epsilon = \frac{x}{P} \left( \frac{\partial P}{\partial \bar{u}} - \frac{\gamma_2 P}{\bar{u}} \right). \quad (23)$$

In general for all considered distributions of spine volume, the numerical value of  $\epsilon$  is very small at the critical point, i.e.  $|\epsilon| \ll 1$ . Typical values of  $F_{ij}$  are in the range  $(-1.7, 1)$ . Thus, approximately the sign of  $D_2$  is determined by the sign of the product  $F_{33}(F_{12} - F_{11})$ , since other terms in Eq. (22) are much smaller and thus can be neglected. Of these two factors,  $F_{33}$  is always negative (which comes from a numerical calculation) and  $(F_{12} - F_{11}) = -\lambda_2/x$  is always positive ( $\lambda_2 < 0$ ). This implies that  $D_2$  is negative, and  $D_1$  is positive, which is sufficient for the benefit-cost function  $F_s$  (Eq. 10) to have maximum. Exact numerical values of the rescaled minors  $D_1/g_1^2$  and  $D_2/g_1^2$  are presented in Table B (below) together with the values of  $\epsilon$  and  $F_{ij}$ .

**Table B:** “Spine economical maximization”. The numerical values of the elements of the bordered Hessian and principal minors for each type of the spine volume distribution.

| Spine size distribution | $\theta$   | $\epsilon$ | Bordered Hessian |          |          |          | Minors      |             |
|-------------------------|------------|------------|------------------|----------|----------|----------|-------------|-------------|
|                         |            |            | $F_{11}$         | $F_{12}$ | $F_{13}$ | $F_{33}$ | $D_1/g_1^2$ | $D_2/g_1^2$ |
| Exponential             | 0.100 (ED) | -0.053     | 0.017            | 0.621    | -0.018   | -0.059   | 1.207       | -0.072      |
|                         | 0.100 (MD) | -0.053     | 0.017            | 0.621    | -0.018   | -0.059   | 1.207       | -0.072      |
|                         | 0.321 (ED) | 0.024      | 0.016            | 0.540    | -0.010   | -0.145   | 1.048       | -0.151      |
|                         | 0.321 (MD) | 0.014      | 0.014            | 0.526    | -0.009   | -0.098   | 1.023       | -0.100      |
| Gamma (n=1)             | 0.100 (ED) | -0.072     | 0.017            | 0.657    | -0.020   | -0.055   | 1.279       | -0.072      |
|                         | 0.100 (MD) | -0.072     | 0.017            | 0.657    | -0.020   | -0.055   | 1.279       | -0.072      |
|                         | 0.321 (ED) | 0.061      | 0.022            | 0.664    | -0.014   | -0.397   | 1.284       | -0.506      |
|                         | 0.321 (MD) | 0.017      | 0.016            | 0.606    | -0.012   | -0.165   | 1.180       | -0.194      |
| Gamma (n=2)             | 0.100 (ED) | -0.062     | 0.013            | 0.645    | -0.014   | -0.024   | 1.263       | -0.031      |
|                         | 0.100 (MD) | -0.062     | 0.013            | 0.645    | -0.014   | -0.024   | 1.263       | -0.031      |
|                         | 0.321 (ED) | 0.085      | 0.025            | 0.739    | -0.016   | -0.653   | 1.427       | -0.924      |
|                         | 0.321 (MD) | 0.033      | 0.020            | 0.669    | -0.015   | -0.315   | 1.298       | -0.408      |
| Rayleigh                | 0.100 (ED) | -0.098     | 0.020            | 0.677    | -0.027   | -0.072   | 1.314       | -0.097      |
|                         | 0.100 (MD) | -0.058     | 0.013            | 0.641    | -0.013   | -0.021   | 1.256       | -0.028      |
|                         | 0.321 (ED) | 0.067      | 0.025            | 0.734    | -0.018   | -0.654   | 1.418       | -0.921      |
|                         | 0.321 (MD) | 0.015      | 0.019            | 0.662    | -0.016   | -0.283   | 1.285       | -0.362      |
| Log-logistic            | 0.100 (ED) | -0.016     | 0.022            | 0.654    | -0.022   | -0.189   | 1.264       | -0.240      |
|                         | 0.100 (MD) | -0.016     | 0.022            | 0.654    | -0.022   | -0.189   | 1.264       | -0.240      |
|                         | 0.321 (ED) | 0.124      | 0.026            | 0.778    | -0.014   | -0.895   | 1.505       | -1.332      |
|                         | 0.321 (MD) | 0.075      | 0.025            | 0.784    | -0.019   | -0.949   | 1.518       | -1.432      |
| Log-normal              | 0.100 (ED) | -0.074     | 0.021            | 0.582    | -0.025   | -0.247   | 1.121       | -0.279      |
|                         | 0.100 (MD) | -0.074     | 0.017            | 0.616    | -0.019   | -0.076   | 1.199       | -0.092      |
|                         | 0.321 (ED) | 0.044      | 0.023            | 0.683    | -0.018   | -1.737   | 1.321       | -2.292      |
|                         | 0.321 (MD) | -0.030     | 0.021            | 0.666    | -0.022   | -0.797   | 1.290       | -1.029      |

For each value of  $\theta$  there are two values of Hessian matrix and Minors corresponding to minimal Euclidean (ED) and Mahalanobis (MD) distances.

### 3 Combined “wire minimization” and “spine economy maximization” principle.

#### 3.1 The system of basic equations for optimal solution.

The optimal values of  $x, y, \bar{u}$ , and  $\lambda$  are found by differentiating the meta fitness function  $F$  (Eq. 1 in the main text) with respect to  $x, y, \bar{u}$ , and  $\lambda$ , and requiring that appropriate derivatives are zero. As a result, we obtain the following set of four nonlinear equations:

$$\frac{f r x}{\bar{u}^{\gamma_1}} - \frac{(1-f)s}{\bar{u}^{\gamma_2}} + \lambda \left( x + s + \frac{2}{3}g + \frac{5}{3}c \right) = 0, \quad (24)$$

$$\frac{f y}{\bar{u}^{\gamma_1}} - \frac{(1-f)s}{\bar{u}^{\gamma_2}} + \lambda \left( y + s + \frac{2}{3}g + \frac{5}{3}c \right) = 0, \quad (25)$$

$$\left( \left[ \lambda - \frac{(1-f)}{\bar{u}^{\gamma_2}} \right] s + \frac{\lambda g}{3}(2 + 5s) \right) \frac{\bar{u}}{P} \frac{\partial P}{\partial \bar{u}} - \frac{2}{3}\lambda g(1 + s) = \frac{\gamma_1 f}{\bar{u}^{\gamma_1}}(r x + y) - \frac{\gamma_2 s(1-f)}{\bar{u}^{\gamma_2}} \quad (26)$$

and

$$x + y + s + g + c = 1. \quad (27)$$

### **Reduction of dimensionality in the system of basic equations.**

As before we can reduce the number of equations from 4 to 3. For this purpose, we determine  $\lambda$  from Eq. (25):

$$\lambda = \frac{(1-f)\frac{s}{u^{1/2}} - f\frac{y}{u^{1/4}}}{y + s + \frac{2}{3}g + \frac{5}{3}c} \quad (28)$$

and next, we insert this equation into Eqs. (24) and (26). As a result, we get Eqs. (26-27) in the main text.

### **3.2 Proof of the local maximum for optimal solution related to spine economy.**

The bordered Hessian matrix can be determined similarly as in the previous two cases. A sufficient condition for the meta fitness function  $F$  (Eq. 1 in the main text) to have a local minimum is that two principal minors are negative. Exact numerical values of the minors and elements of the bordered Hessian are displayed in Tables C-E, for different mixing ratio  $f$  in  $F$ . These tables correspond to Tables 4-6 in the main text.



**Table C:** Combined “Wire min + spine max” approach for  $f = 0.1$ .

| Principle type/<br>spine distr.     | Bordered Hessian |          |          |          |          |          | Minors |        |
|-------------------------------------|------------------|----------|----------|----------|----------|----------|--------|--------|
|                                     | $F_{11}$         | $F_{12}$ | $F_{22}$ | $F_{13}$ | $F_{23}$ | $F_{33}$ | $D_1$  | $D_2$  |
| <b>wire length min + spine max</b>  |                  |          |          |          |          |          |        |        |
| Exponential                         | -0.010           | -0.694   | -0.010   | 0.141    | 0.141    | 0.163    | -2.870 | -0.455 |
| Gamma (n=1)                         | -0.013           | -0.809   | -0.014   | 0.154    | 0.153    | 0.324    | -3.664 | -1.154 |
| Gamma (n=2)                         | -0.015           | -0.895   | -0.017   | 0.172    | 0.168    | 0.540    | -4.228 | -2.219 |
| Rayleigh                            | -0.015           | -0.898   | -0.018   | 0.177    | 0.171    | 0.535    | -4.289 | -2.252 |
| Log-logistic                        | -0.017           | -0.963   | -0.022   | 0.173    | 0.156    | 1.056    | -4.867 | -5.045 |
| Log-normal                          | -0.019           | -1.000   | -0.022   | 0.228    | 0.222    | 2.370    | -5.103 | -12.13 |
| <b>wire surface min + spine max</b> |                  |          |          |          |          |          |        |        |
| Exponential                         | -0.008           | -0.598   | -0.009   | 0.058    | 0.058    | 0.104    | -2.488 | -0.254 |
| Gamma (n=1)                         | -0.011           | -0.707   | -0.012   | 0.068    | 0.067    | 0.230    | -3.211 | -0.726 |
| Gamma (n=2)                         | -0.013           | -0.764   | -0.015   | 0.073    | 0.070    | 0.368    | -3.626 | -1.316 |
| Rayleigh                            | -0.013           | -0.760   | -0.016   | 0.074    | 0.071    | 0.349    | -3.645 | -1.262 |
| Log-logistic                        | -0.015           | -0.843   | -0.020   | 0.078    | 0.071    | 0.822    | -4.264 | -3.472 |
| Log-normal                          | -0.023           | -0.988   | -0.030   | 0.112    | 0.100    | 6.943    | -4.898 | -33.89 |
| <b>wire volume min + spine max</b>  |                  |          |          |          |          |          |        |        |
| Exponential                         | -0.008           | -0.545   | -0.008   | 0.005    | 0.005    | 0.090    | -2.267 | -0.204 |
| Gamma (n=1)                         | -0.011           | -0.637   | -0.012   | 0.008    | 0.008    | 0.209    | -2.886 | -0.601 |
| Gamma (n=2)                         | -0.012           | -0.681   | -0.014   | 0.010    | 0.010    | 0.296    | -3.239 | -0.955 |
| Rayleigh                            | -0.012           | -0.674   | -0.014   | 0.010    | 0.011    | 0.271    | -3.240 | -0.878 |
| Log-logistic                        | -0.014           | -0.759   | -0.019   | 0.013    | 0.015    | 0.734    | -3.833 | -2.804 |
| Log-normal                          | -0.015           | -0.726   | -0.021   | 0.016    | 0.019    | 1.938    | -3.632 | -7.038 |
| <b>delays min + spine max</b>       |                  |          |          |          |          |          |        |        |
| Exponential                         | -0.011           | -0.751   | -0.011   | 0.195    | 0.195    | 0.202    | -3.102 | -0.603 |
| Gamma (n=1)                         | -0.014           | -0.888   | -0.015   | 0.220    | 0.219    | 0.411    | -4.012 | -1.589 |
| Gamma (n=2)                         | -0.015           | -0.941   | -0.018   | 0.224    | 0.219    | 0.562    | -4.461 | -2.433 |
| Rayleigh                            | -0.018           | -1.004   | -0.020   | 0.258    | 0.253    | 0.712    | -4.778 | -3.313 |
| Log-logistic                        | -0.019           | -1.076   | -0.025   | 0.250    | 0.231    | 1.389    | -5.407 | -7.316 |
| Log-normal                          | -0.022           | -1.127   | -0.026   | 0.326    | 0.316    | 3.596    | -5.570 | -19.96 |

**Table D:** Combined “Wire min + spine max” approach for  $f = 0.5$ .

| Principle type/<br>spine distr.     | Bordered Hessian |          |          |          |          |          | Minors |                   |
|-------------------------------------|------------------|----------|----------|----------|----------|----------|--------|-------------------|
|                                     | $F_{11}$         | $F_{12}$ | $F_{22}$ | $F_{13}$ | $F_{23}$ | $F_{33}$ | $D_1$  | $D_2$             |
| <b>wire length min + spine max</b>  |                  |          |          |          |          |          |        |                   |
| Exponential                         | -0.432           | -16.79   | -0.432   | 9.602    | 9.604    | 858.9    | -43.24 | -35899.2          |
| Gamma (n=1)                         | -0.132           | -6.323   | -0.126   | 4.242    | 4.230    | 85.09    | -19.83 | -1542.5           |
| Gamma (n=2)                         | -0.055           | -4.065   | -0.051   | 2.668    | 2.612    | 24.29    | -15.13 | -320.69           |
| Rayleigh                            | -0.054           | -4.001   | -0.050   | 2.546    | 2.491    | 27.10    | -15.66 | -378.75           |
| Log-logistic                        | -0.017           | -2.778   | -0.021   | 1.360    | 1.459    | 11.86    | -13.58 | -146.30           |
| Log-normal                          | 0.008            | -1.679   | 0.010    | 0.871    | 1.000    | 1.299    | -8.369 | -10.948           |
| <b>wire surface min + spine max</b> |                  |          |          |          |          |          |        |                   |
| Exponential                         | -0.017           | -2.345   | -0.017   | 1.280    | 1.280    | 12.93    | -7.794 | -91.96            |
| Gamma (n=1)                         | 0.008            | -1.536   | 0.008    | 0.583    | 0.583    | 1.576    | -6.470 | -8.808            |
| Gamma (n=2)                         | 0.012            | -1.206   | 0.012    | 0.353    | 0.353    | 0.231    | -5.844 | -1.155            |
| Rayleigh                            | 0.010            | -1.320   | 0.011    | 0.402    | 0.433    | 0.645    | -6.353 | -3.725            |
| Log-logistic                        | 0.005            | -1.377   | 0.008    | 0.344    | 0.424    | 1.764    | -7.203 | -12.18            |
| Log-normal                          | 0.010            | -1.317   | 0.013    | 0.384    | 0.448    | 3.027    | -6.831 | -20.67            |
| <b>wire volume min + spine max</b>  |                  |          |          |          |          |          |        |                   |
| Exponential                         | 0.017            | -0.639   | 0.017    | -0.011   | -0.011   | 0.098    | -2.754 | -0.272            |
| Gamma (n=1)                         | 0.014            | -0.733   | 0.016    | -0.010   | -0.011   | 0.208    | -3.451 | -0.720            |
| Gamma (n=2)                         | 0.013            | -0.786   | 0.016    | -0.011   | -0.012   | 0.308    | -3.877 | -1.196            |
| Rayleigh                            | 0.014            | -0.788   | 0.016    | -0.012   | -0.013   | 0.336    | -3.921 | -1.320            |
| Log-logistic                        | 0.011            | -0.872   | 0.014    | -0.009   | -0.011   | 0.837    | -4.561 | -3.817            |
| Log-normal                          | 0.014            | -0.810   | 0.019    | -0.016   | -0.018   | 1.980    | -4.282 | -8.477            |
| <b>delays min + spine max</b>       |                  |          |          |          |          |          |        |                   |
| Exponential                         | -1.173           | -47.71   | -1.174   | 27.45    | 27.48    | 4239.5   | -115.2 | $-4.7 \cdot 10^5$ |
| Gamma (n=1)                         | -0.290           | -11.87   | -0.290   | 8.223    | 8.223    | 280.65   | -34.14 | $-8.9 \cdot 10^3$ |
| Gamma (n=2)                         | -0.142           | -7.007   | -0.142   | 5.057    | 5.057    | 82.31    | -23.48 | $-1.7 \cdot 10^3$ |
| Rayleigh                            | -0.133           | -6.587   | -0.133   | 4.521    | 4.521    | 83.58    | -23.60 | $-1.8 \cdot 10^3$ |
| Log-logistic                        | -0.017           | -3.069   | -0.022   | 1.785    | 1.994    | 12.03    | -15.63 | -170.03           |
| Log-normal                          | -0.022           | -3.329   | -0.031   | 2.025    | 2.332    | 70.05    | -16.83 | -1156.2           |

**Table E:** Combined “Wire min + spine max” approach for  $f = 0.9$ .

| Principle type/<br>spine distr.     | Bordered Hessian |          |              |             |             |              | Minors  |               |
|-------------------------------------|------------------|----------|--------------|-------------|-------------|--------------|---------|---------------|
|                                     | $F_{11}$         | $F_{12}$ | $F_{22}$     | $F_{13}$    | $F_{23}$    | $F_{33}$     | $D_1$   | $D_2$         |
| <b>wire length min + spine max</b>  |                  |          |              |             |             |              |         |               |
| Exponential                         | $-2*10^{-7}$     | -0.027   | $-2*10^{-7}$ | $3*10^{-8}$ | $3*10^{-8}$ | $7*10^{-13}$ | -0.107  | $-8*10^{-14}$ |
| Gamma (n=1)                         | -28.19           | -3134.4  | -28.19       | -854.0      | -854.0      | $8*10^5$     | -6590.6 | $-5*10^9$     |
| Gamma (n=2)                         | -8.533           | -666.9   | -8.533       | -169.3      | -169.3      | $10^5$       | -1440.5 | $-10^8$       |
| Rayleigh                            | -6.136           | -283.8   | -6.136       | -87.28      | -87.28      | $4*10^4$     | -660.35 | $-2*10^7$     |
| Log-logistic                        | $-2*10^{-7}$     | -0.027   | $-2*10^{-7}$ | $3*10^{-8}$ | $3*10^{-8}$ | $7*10^{-13}$ | -0.107  | $-8*10^{-14}$ |
| Log-normal                          | -0.677           | -20.66   | -0.944       | -1.887      | -4.444      | 17389.8      | -100.47 | $-2*10^6$     |
| <b>wire surface min + spine max</b> |                  |          |              |             |             |              |         |               |
| Exponential                         | -11.59           | -1045.9  | -11.59       | -397.0      | -397.0      | $4*10^5$     | -2222.0 | $-8*10^8$     |
| Gamma (n=1)                         | -1.608           | -94.90   | -1.608       | -23.57      | -23.57      | 12275.2      | -211.3  | $-2*10^6$     |
| Gamma (n=2)                         | -0.606           | -29.01   | -0.606       | -3.631      | -3.631      | 2166.6       | -68.41  | $-10^5$       |
| Rayleigh                            | -0.528           | -20.09   | -0.528       | -2.217      | -2.217      | 1437.8       | -51.82  | $-7*10^4$     |
| Log-logistic                        | -0.084           | -5.240   | -0.118       | 0.747       | 0.745       | 329.89       | -26.11  | $-8*10^3$     |
| Log-normal                          | -0.013           | -3.494   | -0.017       | 1.029       | 1.174       | 477.03       | -17.12  | $-8*10^3$     |
| <b>wire volume min + spine max</b>  |                  |          |              |             |             |              |         |               |
| Exponential                         | 0.043            | -0.725   | 0.043        | -0.028      | -0.028      | 0.079        | -3.220  | -0.257        |
| Gamma (n=1)                         | 0.042            | -0.840   | 0.042        | -0.031      | -0.031      | 0.177        | -4.074  | -0.724        |
| Gamma (n=2)                         | 0.036            | -0.878   | 0.047        | -0.030      | -0.034      | 0.284        | -4.456  | -1.273        |
| Rayleigh                            | 0.038            | -0.879   | 0.049        | -0.034      | -0.038      | 0.325        | -4.501  | -1.470        |
| Log-logistic                        | 0.038            | -0.986   | 0.049        | -0.032      | -0.036      | 0.948        | -5.277  | -5.015        |
| Log-normal                          | 0.044            | -0.913   | 0.057        | -0.046      | -0.052      | 2.645        | -4.907  | -12.99        |
| <b>delays min + spine max</b>       |                  |          |              |             |             |              |         |               |
| Exponential                         | $-2*10^{-6}$     | -0.034   | $-2*10^{-6}$ | $5*10^{-7}$ | $3*10^{-7}$ | $10^{-10}$   | -0.135  | $-2*10^{-11}$ |
| Gamma (n=1)                         | $-2*10^{-6}$     | -0.034   | $-2*10^{-6}$ | $5*10^{-7}$ | $3*10^{-7}$ | $10^{-10}$   | -0.135  | $-2*10^{-11}$ |
| Gamma (n=2)                         | -20.49           | -1961.9  | -20.49       | -488.7      | -488.7      | $3*10^5$     | -4169.7 | $-2*10^9$     |
| Rayleigh                            | -16.33           | -865.41  | -16.33       | -287.2      | -287.2      | $10^5$       | -1961.9 | $-3*10^8$     |
| Log-logistic                        | $-2*10^{-6}$     | -0.034   | $-2*10^{-6}$ | $5*10^{-7}$ | $3*10^{-7}$ | $10^{-10}$   | -0.135  | $-2*10^{-11}$ |
| Log-normal                          | -0.746           | -23.22   | -1.035       | -0.794      | -3.932      | 19583.9      | -112.99 | $-2*10^6$     |

## References

- [1] Press WH, Teukolsky SA, Vetterling WT, Flannery BP (1992) *Numerical Recipes in Fortran*. Cambridge: Cambridge Univ. Press.
- [2] Neudecker H, Magnus JR (1988) *Matrix Differential Calculus with Applications in Statistics and Econometrics*. New York: Wiley.
